# Supplementary material
Source: publisher figshare collection journal article supplement (https://acs.figshare.com/ndownloader/files/5162629)
Supplement: Supplementary file 1 [file 5162629]

## Supporting Materials

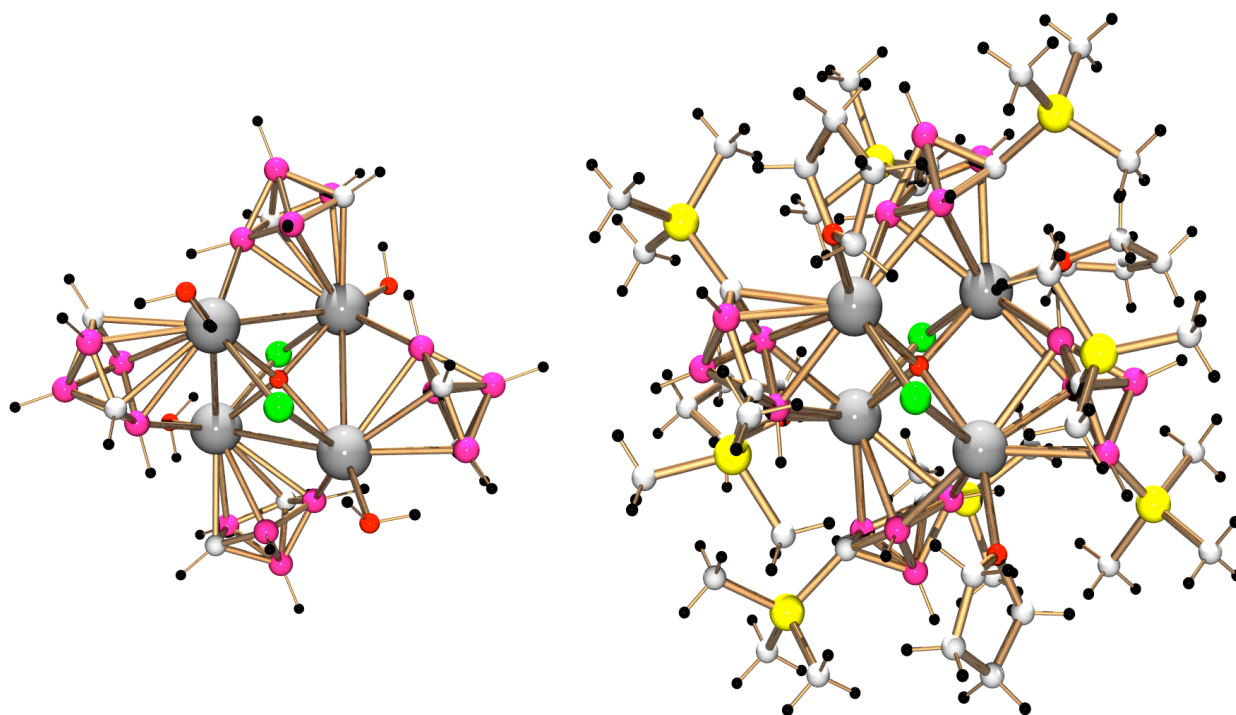

Figure 1. Calculated structure of model system  $\text{La}_4\text{OCl}_2(\text{C}_2\text{B}_4\text{H}_6)_4(\text{OH}_2)_4$  (left) as compared with crystallographically determined structure of  $\text{Nd}_4\text{OCl}_2(\text{C}_2\text{B}_4\text{H}_4[\text{SiMe}_3]_2)_4(\text{THF})_4$  (right), in the same orientation. Color scheme: B, pink; C, light grey; M, grey; O, red; Si, yellow; H, black.

Table 1. Selected interatomic distances (Å) for calculated structure of  $\text{La}_4\text{OCl}_2(\text{C}_2\text{B}_4\text{H}_6)_4(\text{OH}_2)_4$  and crystallographically determined structure of  $\text{Nd}_4\text{OCl}_2(\text{C}_2\text{B}_4\text{H}_4[\text{SiMe}_3]_2)_4(\text{THF})_4$ .

|                       | $\text{La}_4\text{OCl}_2(\text{C}_2\text{B}_4\text{H}_6)_4(\text{OH}_2)_4$ | $\text{Nd}_4\text{OCl}_2(\text{C}_2\text{B}_4\text{H}_4[\text{SiMe}_3]_2)_4(\text{THF})_4$ |
|-----------------------|----------------------------------------------------------------------------|--------------------------------------------------------------------------------------------|
| M-M                   | 3.957, 4.092, 3.898, 3.957, 4.088                                          | 3.828, 3.966, 3.825, 3.979, 3.828                                                          |
| M-O                   | 2.421, 2.457                                                               | 2.378, 2.369                                                                               |
| M-O <sub>THF</sub>    | 2.575, 2.451                                                               | 2.484, 2.499                                                                               |
| M-Cl                  | 2.951, 2.969                                                               | 2.780, 2.797                                                                               |
| M-C                   | 2.840, 2.753                                                               | 2.778, 2.795                                                                               |
| M-B                   | 2.780, 2.891, 2.850                                                        | 2.766, 2.786, 2.766                                                                        |
| M-B <sub>BRIDGE</sub> | 2.863, 2.968                                                               | 2.770, 2.877                                                                               |
